# Supplementary material for: Effects of rhodomyrtone on Gram-positive bacterial tubulin homologue FtsZ
Source: PeerJ. 2017 Feb 2;5:e2962. doi: 10.7717/peerj.2962 (PMC5292029; doi:10.7717/peerj.2962)
Supplement: Data S1 [file peerj-05-2962-s002.xlsx]

## Sheet: standard-curve
KH2PO4	62.5	31.25	15.625	0
1st	0.602	0.368	0.223	0.077
2nd	0.678	0.414	0.293	0.089
3rd	0.587	0.332	0.212	0.081
average	0.622333	0.371333	0.242667	0.0823333
SD	0.0487887	0.0411015	0.0439356	0.0061101

## Sheet: test
		3-MBA			Rho					Cephalexin
	control	3-MBA 20 mM	3-MBA 10 mM	3-MBA 5 mM	rhodomyrtone 20 µM	rhodomyrtone 10 µM	rhodomyrtone 5 µM		control	10 µM
1st	0.417	0.26	0.307	0.316	0.269	0.24	0.203		0.477	0.455
2nd	0.228	0.16	0.156	0.154	0.208	0.189	0.196		0.604	0.643
3rd	0.328	0.247	0.256	0.297	0.263	0.267	0.226		0.331	0.431
y-0.0963	0.3207	0.1637	0.2107	0.2197	0.1727	0.1437	0.1067		0.3807	0.3587
	0.1317	0.0637	0.0597	0.0577	0.1117	0.0927	0.0997		0.5077	0.5467
	0.2317	0.1507	0.1597	0.2007	0.1667	0.1707	0.1297		0.2347	0.3347
/0.0085	37.7294	19.2588	24.7882	25.8471	20.3176	16.9059	12.5529		44.7882	42.2
	15.4941	7.49412	7.02353	6.78824	13.1412	10.9059	11.7294		59.7294	64.3176
	27.2588	17.7294	18.7882	23.6118	19.6118	20.0824	15.2588		27.6118	39.3765
GTPase activity		48.9554	34.3	31.4936	46.149	55.1918	66.729			5.77883
		51.6325	54.6697	56.1883	15.186	29.6128	24.2976			-7.6817
		34.959	31.0747	13.3794	28.0535	26.3271	44.0224			-42.6076
average		45.1823	40.0148	33.6871	29.7962	37.0439	45.0164			-14.8368
SD		8.95425	12.7936	21.4886	15.5549	15.8021	21.2331			24.9741
SEM		5.16974	7.38638	12.4064	8.98062	9.12337	12.259			14.4188
